# Supplementary material for: Type 2 Diabetes-Related Health Economic Impact Associated with Increased Whole Grains Consumption among Adults in Finland
Source: MDPI journal article supplement (doi:10.3390/nu13103583), 2021-10-13
Supplement: s1 [file s1]

# Graphical scheme of the study design:

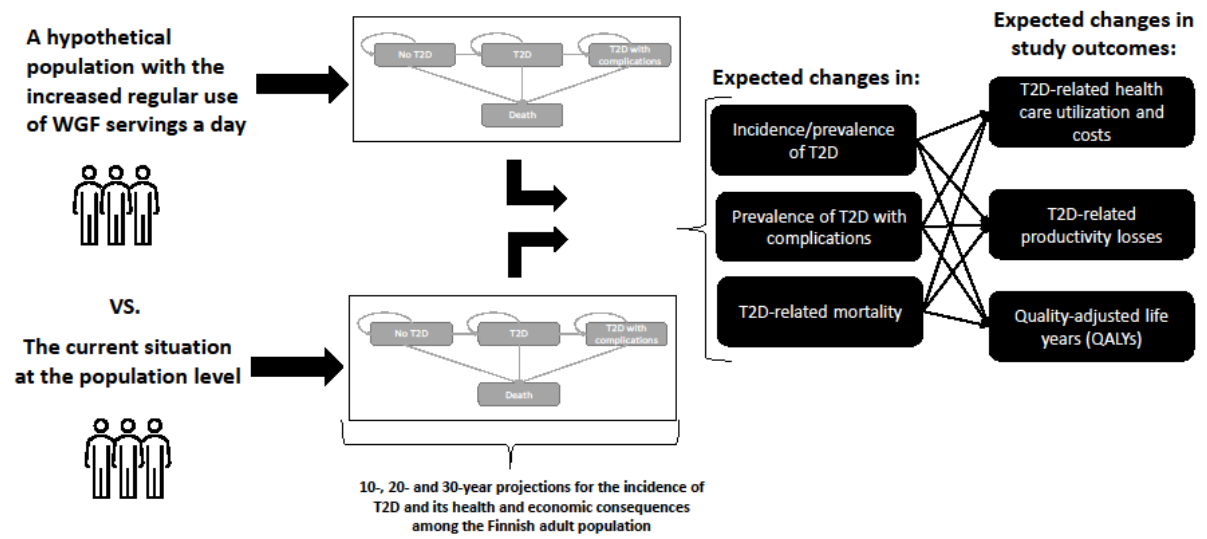

**Figure S1** Graphical scheme of the study design

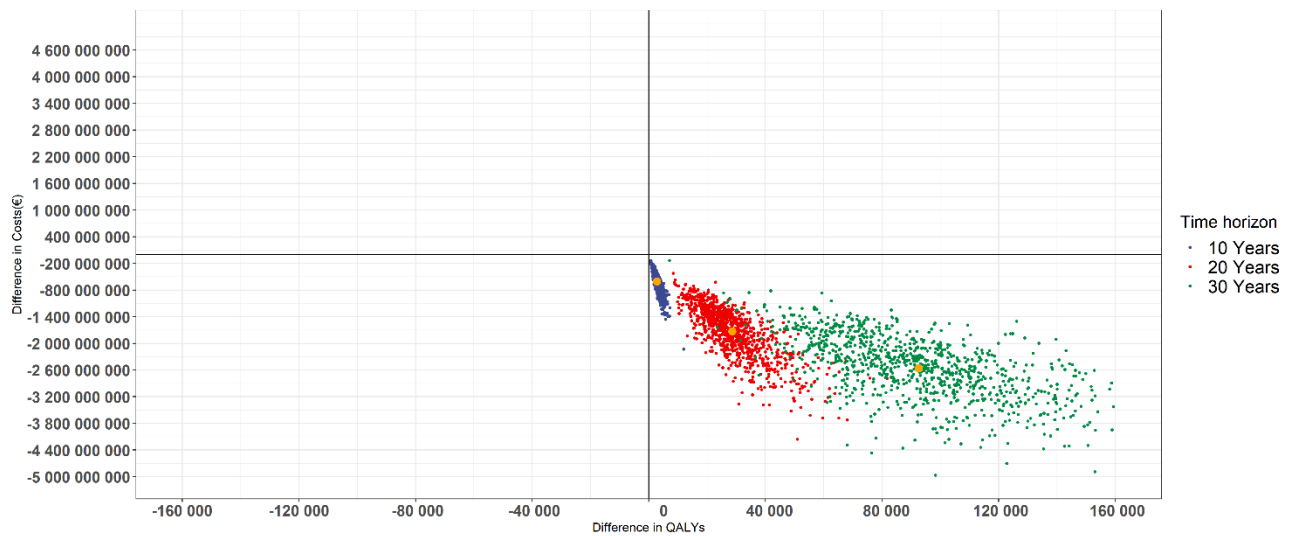

**Figure S2A** Results of the probabilistic sensitivity analysis showing the impact of applied time horizon on the distribution of expected population-level cost savings and gained QALYs on the X-Y-plane using Scenario II (one or more additional whole grain servings a day among those who already use at least one whole grain serving a day) as an example. Blue, red, and green color stands for 10-year, 20-year, and 30-year time horizon, respectively.

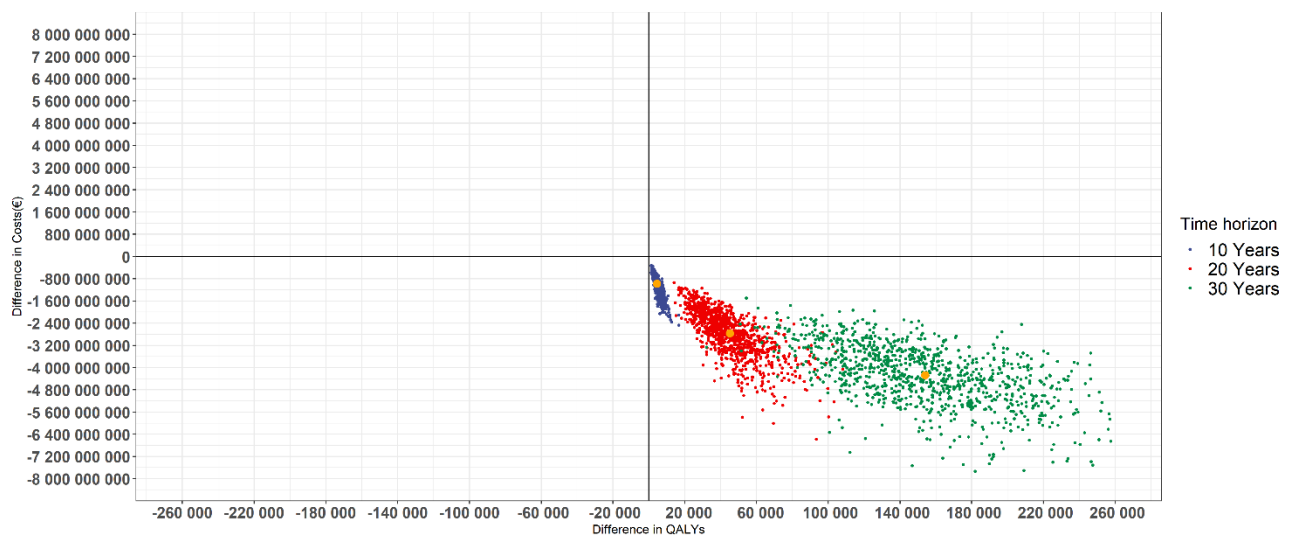

**Figure S2B** Results of the probabilistic sensitivity analysis showing the impact of applied time horizon on the distribution of expected population-level cost savings and gained QALYs on the X-Y-plane using Scenario III (the combination of Scenarios I and II) as an example. Blue, red, and green color stands for 10-year, 20-year, and 30-year time horizon, respectively.

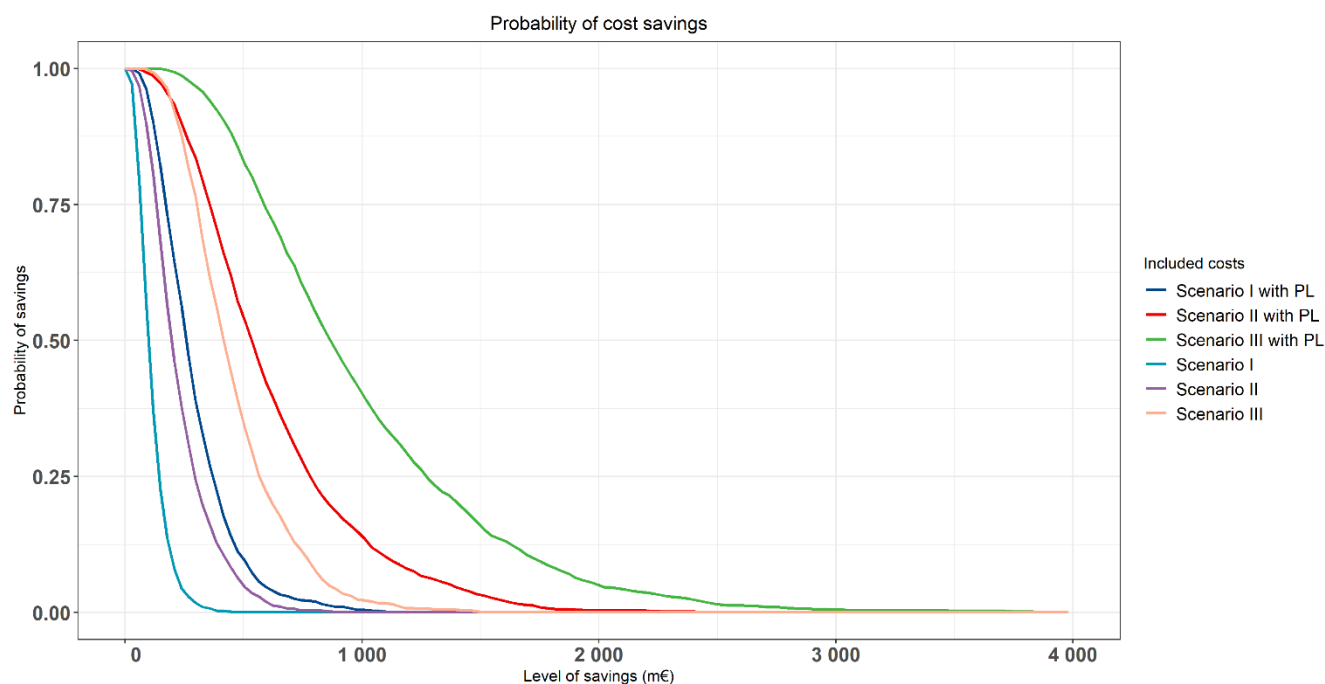

**Figure S3A** Probability of cumulative savings (with and without T2D-related productivity losses) in the modelled scenarios when applying the 10-year time horizon (2017 as a baseline year). Scenario I: a 10%-unit increase in the Finnish population using at least one whole grain food serving a day, Scenario II: one or more additional whole grain servings a day among those who already use at least one whole grain serving a day, and Scenario III: the combination of Scenarios I and II. In all scenarios, the current situation was applied as a comparator. PL= productivity losses due to T2D.

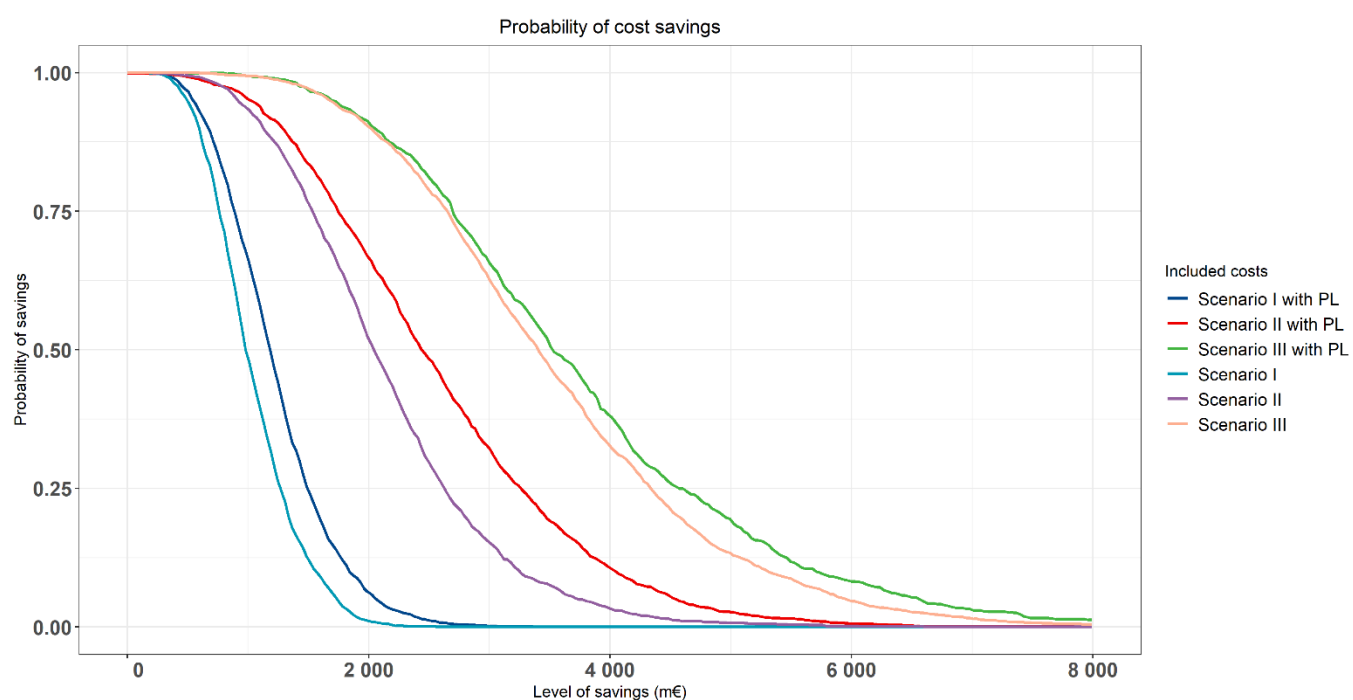

**Figure S3B** Probability of cumulative savings (with and without T2D-related productivity losses) in the modelled scenarios when applying the 30-year time horizon (2017 as a baseline year). Scenario I: a 10%-unit increase in the Finnish population using at least one whole grain food serving a day, Scenario II: one or more additional whole grain servings a day among those who already use at least one whole grain serving a day, and Scenario III: the combination of Scenarios I and II. In all scenarios, the current situation was applied as a comparator. PL= productivity losses due to T2D.

**Table S1:** The FINDRISC score distribution in the general population [23].

| Gender | Age      | FINDRISC | FINDRISC | FINDRISC | FINDRISC | FINDRISC |
|--------|----------|----------|----------|----------|----------|----------|
|        |          | 0–6      | 7–11     | 12–14    | 15–19    | 20–26    |
| Men    | 30 to 39 | 0.738    | 0.214    | 0.048    | 0.00     | 0.00     |
| Men    | 40 to 49 | 0.545    | 0.330    | 0.098    | 0.028    | 0.00     |
| Men    | 50 to 59 | 0.288    | 0.412    | 0.178    | 0.104    | 0.017    |
| Men    | 60 to 69 | 0.195    | 0.470    | 0.177    | 0.135    | 0.022    |
| Men    | 70 to 79 | 0.193    | 0.484    | 0.155    | 0.143    | 0.025    |
| Women  | 30 to 39 | 0.687    | 0.216    | 0.073    | 0.022    | 0.001    |
| Women  | 40 to 49 | 0.506    | 0.352    | 0.093    | 0.045    | 0.005    |
| Women  | 50 to 59 | 0.266    | 0.425    | 0.185    | 0.105    | 0.019    |
| Women  | 60 to 69 | 0.163    | 0.444    | 0.237    | 0.126    | 0.003    |
| Women  | 70 to 79 | 0.130    | 0.379    | 0.228    | 0.224    | 0.039    |

**Table S2:** Coefficients of the Weibull regression for incidence of T2D.

| Parameter<br>(95 % CI) | Value (variation)            | p-value   | Distribution | Distribution<br>values used in<br>PSA<br>Mean (SE) |
|------------------------|------------------------------|-----------|--------------|----------------------------------------------------|
| Gamma                  | 2.329<br>(2.101 to 2.582)    | <0.001    | Normal       | 2.329 (0.122)                                      |
| Sex Coefficient        | -0.256<br>(-0.370 to -0.150) | <0.001    | Normal       | -0.256 (0.256)                                     |
| Age Coefficient        | -0.002<br>(-0.091 to 0.005)  | 0.532     | Normal       | -0.002 (0.0016)                                    |
| Constant               | 4.668<br>(4.158 to 5.185)    | <0.001    | Normal       | 4.668 (1.199)                                      |
| FINDRISC 0-6           | 0.000<br>(0.000 to 0.000)    | Reference | Normal       | 0.000 (0.000)                                      |
| FINDRISC 7-11          | -0.486<br>(-0.779 to -0.192) | <0.001    | Normal       | -0.486 (0.691)                                     |
| FINDRISC 12-14         | -0.908<br>(-1.200 to -0.615) | <0.001    | Normal       | -0.908 (0.687)                                     |
| FINDRISC 15-19         | -1.284<br>(-1.569 to -0.998) | <0.001    | Normal       | -1.284 (0.672)                                     |
| FINDRISC 20+           | -1.658<br>(-1.964 to -1.351) | <0.001    | Normal       | -1.658 (0.719)                                     |

The FINDRISC score groups (0-6, 7-11, 12-14, 15-19 and 20-26) are beta coefficients of the regression model.

**Table S3:** The complications considered to be T2D-related in the Weibull regression model.

| <b>Complication</b>                                                   | <b>ICD-10</b>                                                                                  |
|-----------------------------------------------------------------------|------------------------------------------------------------------------------------------------|
| <b>Eye complications</b>                                              |                                                                                                |
| Retinopathy or other diabetic eye complication,                       | E11.3, H28.0, H36 (excluding H36.8), H40.5, H42.0, H43.1, H45.0,                               |
| <b>Renal complications</b>                                            |                                                                                                |
| Renal insufficiency                                                   | E11.2, N08.3, N18                                                                              |
| End-stage renal disease (with or without dialysis)                    | Z49, Z94.0                                                                                     |
| <b>Neuropathic complications</b>                                      |                                                                                                |
| Amputation of lower extremities                                       | NOMESCO: NFQ10, NFQ20, NGQ10, NGQ20, NHQ10, NHQ20, NFQ48, NGQ48, NHQ30, NHQ40, NHQ60           |
| Diabetic neuropathy, Charcot foot or other diabetic foot complication | E11.4, E11.5, E11.6, G59.0, G63.2, G73.0, G99.0, I70.2, I73.9, I79.2, L97, M14.2, M14.6, N48.4 |
| <b>Cardiovascular complications</b>                                   |                                                                                                |
| Angina pectoris                                                       | I20.0                                                                                          |
| Chronic heart failure                                                 | I11.0, I13.0, I13.2, I50                                                                       |
| Incident myocardial infarction/cardiac arrest                         | I21, I46                                                                                       |
| Other ischemic heart disease                                          | I22–I25                                                                                        |
| <b>Cerebrovascular complications</b>                                  |                                                                                                |
| Ischemic stroke                                                       | I63–I66 (excluding I63.6)                                                                      |

**Table S4:** Weibull regression coefficients for the incidence of T2D-related complications.

| Parameter<br>(95 % CI) | Value (variation)         | p-value | Distribution<br>applied in PSA | Distribution<br>values used in<br>PSA<br>Mean (SE) |
|------------------------|---------------------------|---------|--------------------------------|----------------------------------------------------|
| Gamma                  | 0.857 (0.778 to 0.944)    | <0.001  | Normal                         | 0.857 (0.084)                                      |
| Age coefficient        | -0.062 (-0.075 to -0.049) | <0.001  | Normal                         | -0.062 (0.063)                                     |
| Sex coefficient        | -0.760 (-1.355 to -0.485) | <0.001  | Normal                         | -0.760 (0.444)                                     |
| Constant               | 8.430 (7.290 to 9.570)    | <0.001  | Normal                         | 8.430 (1.166)                                      |

PSA; Probabilistic Sensitivity Analysis

**Table S5:** Correlations between the Weibull regression coefficients.

| Weibull regression coefficients, risk of T2D               |                    |                    |                    |                 |                    |                    |          |
|------------------------------------------------------------|--------------------|--------------------|--------------------|-----------------|--------------------|--------------------|----------|
|                                                            | FINDRISC<br>7-11   | FINDRISC 12-<br>14 | FINDRISC 15-<br>19 | FINDRISC<br>20+ | Age<br>coefficient | Sex<br>coefficient | Constant |
| FINDRISC<br>7-11                                           | 1                  |                    |                    |                 |                    |                    |          |
| FINDRISC<br>12-14                                          | 0.838              | 1                  |                    |                 |                    |                    |          |
| FINDRISC<br>15-19                                          | 0.837              | 0.885              | 1                  |                 |                    |                    |          |
| FINDRISC<br>20+                                            | 0.763              | 0.829              | 0.873              | 1               |                    |                    |          |
| Age<br>coefficient                                         | -0.017             | -0.033             | -0.039             | -0.047          | 1                  |                    |          |
| Sex<br>coefficient                                         | 0.042              | 0.058              | 0.125              | 0.213           | -0.011             | 1                  |          |
| Constant                                                   | -0.476             | -0.527             | -0.566             | -0.562          | -0.752             | -0.21              | 1        |
| Weibull regression coefficients, risk of T2D complications |                    |                    |                    |                 |                    |                    |          |
|                                                            | Age<br>coefficient | Sex<br>coefficient | Constant           |                 |                    |                    |          |
| Age<br>coefficient                                         | 1                  |                    |                    |                 |                    |                    |          |
| Sex<br>coefficient                                         | 0.284              | 1                  |                    |                 |                    |                    |          |
| Constant                                                   | -0.911             | -0.630             | 1                  |                 |                    |                    |          |
